# Supplementary material for: Phenolics and Volatile Compounds of Fennel (Foeniculum vulgare) Seeds and Their Sprouts Prevent Oxidative DNA Damage and Ameliorates CCl4-Induced Hepatotoxicity and Oxidative Stress in Rats
Source: MDPI journal article supplement (doi:10.3390/antiox11122318), 2022-11-23
Supplement: s1 [file s1]

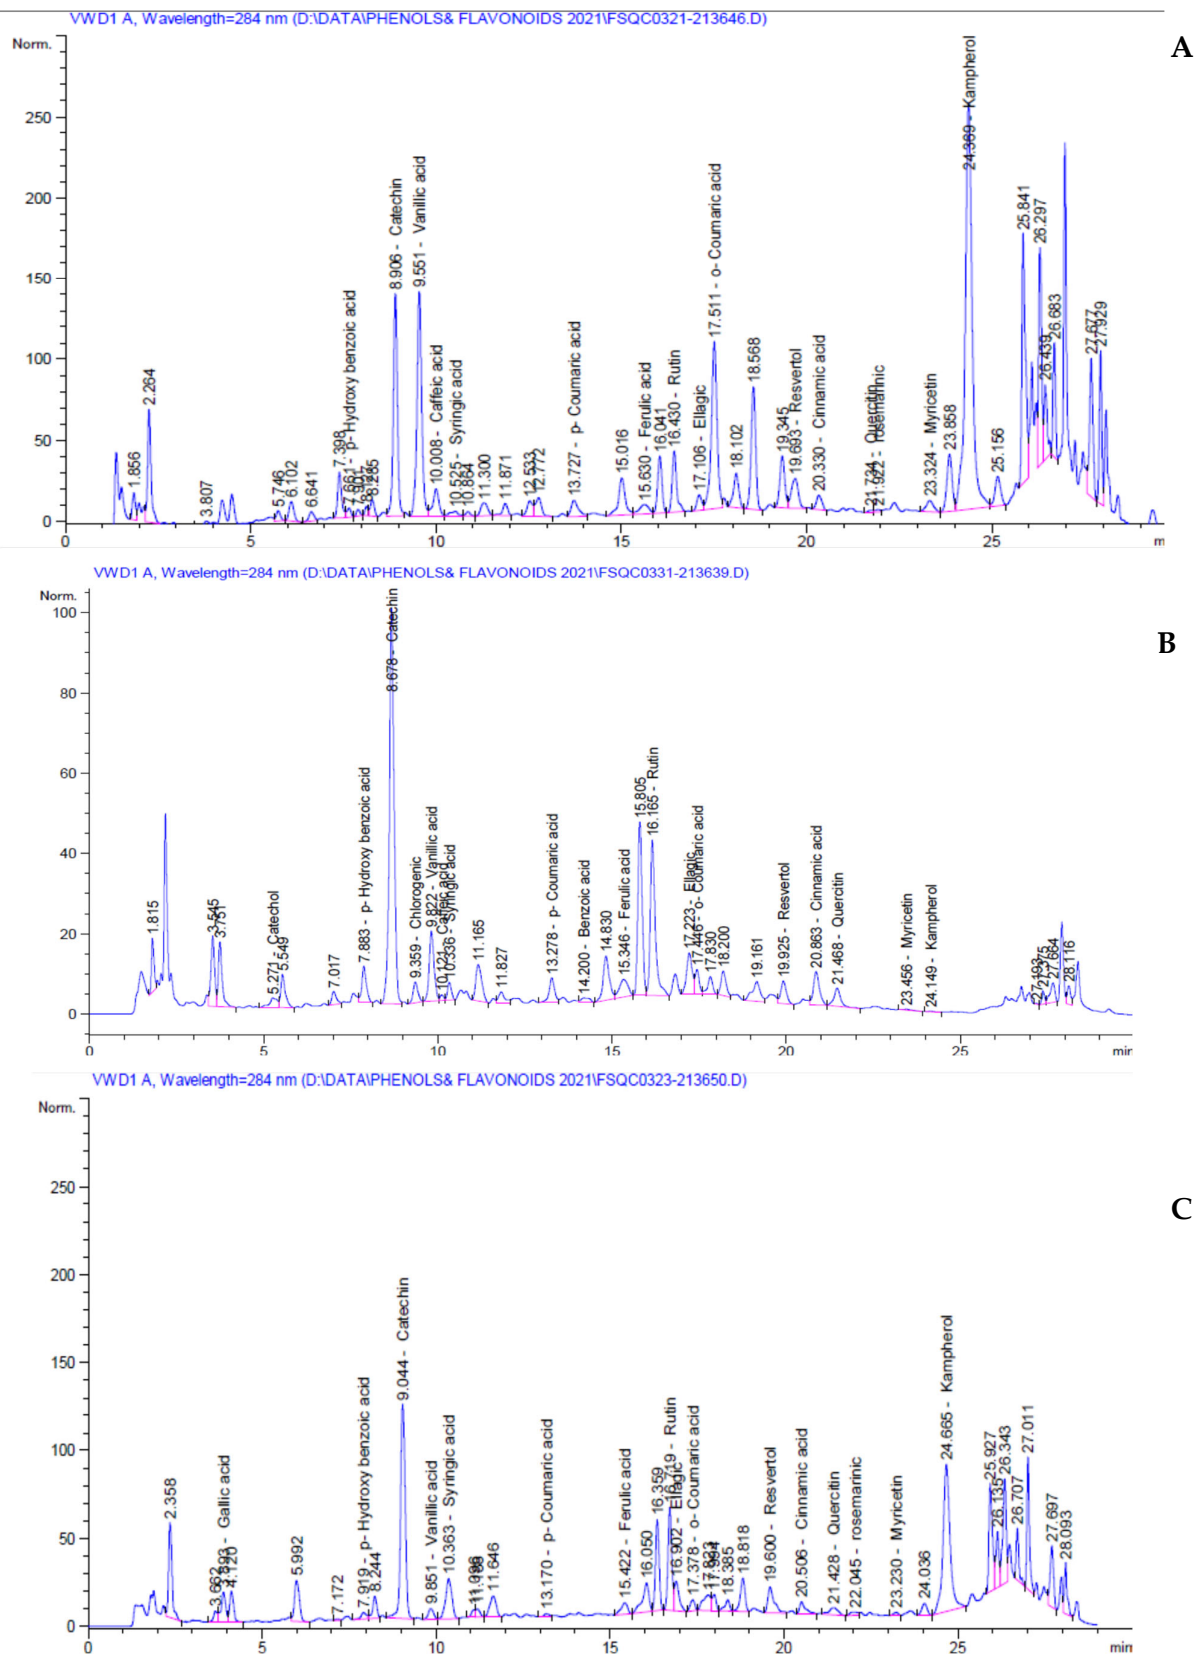

**Figure S1.** HPLC chromatograms of fennel seeds and their sprouts during sprouting for 15 days at  $17 \pm 1^\circ\text{C}$  and 90–93% RH. (A): Raw fennel seeds, (B): 6-days sprouts, and (C): 9-days sprouts. .
